Anesthesiology  
65:703, 1986

## Cutaneous Monitoring of Carbon Dioxide Tension during Bronchoscopy in an Infant with Airway Obstruction

*To the Editor:*—Accurate monitoring of ventilation during diagnostic bronchoscopy for infants with stridor is difficult, and a significant degree of unrecognized hypoventilation can occur. Although continuous evaluation of arterial oxygen saturation is available with pulse oximetry, these devices do not indicate adequacy of ventilation. End-tidal CO<sub>2</sub> monitors are difficult to employ during the change from spontaneous awake ventilation, through assisted ventilation *via* a mask, to bronchoscopic ventilation. We report the application of cutaneous P<sub>CO<sub>2</sub></sub> (PTC<sub>CO<sub>2</sub></sub>) monitoring during pediatric bronchoscopy in a patient with a subglottic hemangioma and compromised ventilation.

### REPORT OF A CASE

A 4-month-old infant with stridor and moderate respiratory distress was scheduled for diagnostic rigid bronchoscopy. Thirty minutes prior to anesthetic induction, a cutaneous CO<sub>2</sub> electrode (Biochem MicroSpan™) was placed on the infant's chest. Monitoring while spontaneously breathing revealed a corrected PTC<sub>CO<sub>2</sub></sub> of 45 mmHg. Following 2 min of preoxygenation, halothane concentrations were incrementally increased to 3% while the infant maintained spontaneous ventilation. As the depth of anesthesia increased, the infant's respiration became more labored with the respiratory rate increasing from 30 to >60 shallow breaths/min. Precordial stethoscope confirmed the presence of airflow, and pulse oximeter indicated 100% hemoglobin O<sub>2</sub> saturation. Nevertheless, corrected PTC<sub>CO<sub>2</sub></sub> steadily climbed from 45 to 65 mmHg. Placement of an oral airway had no effect on relieving airway obstruction. Because synchronizing assisted ventilation was difficult with this degree of tachypnea, a succinylcholine infusion was started and ventilation was easily controlled. Following insertion of the rigid bronchoscope, combined conventional positive pressure and high-frequency jet ventilation was applied through the bronchoscope as corrected PTC<sub>CO<sub>2</sub></sub> dropped to 35 mmHg over the next 2 min. A subglottic hemangioma was easily visualized, and following removal of the bronchoscope, the infant was intubated. Despite bilateral breath sounds, PTC<sub>CO<sub>2</sub></sub> began to rise, followed shortly afterward by a rapid decline in Hgb-O<sub>2</sub> saturation. Esophageal intubation was suspected and the patient was immediately reintubated with a 3.0 mm oral endotracheal tube which was subsequently replaced with a 3.5 mm nasotracheal tube following recovery of PTC<sub>CO<sub>2</sub></sub> and hemoglobin O<sub>2</sub> saturation. The remainder of the clinical course was uneventful.

### DISCUSSION

We report the application of cutaneous P<sub>CO<sub>2</sub></sub> monitoring for pediatric bronchoscopy. These patients often have

airway abnormalities that increase the risk of obstruction and hypoventilation during induction. In addition, use of a rigid Storz® bronchoscope with the Hopkin's rod lens system results in a markedly diminished lumen for gas flow, severely restricting adequacy of ventilation. Cutaneous P<sub>CO<sub>2</sub></sub> monitoring provides a means to evaluate indirectly adequacy of ventilation because values correlate with Pa<sub>CO<sub>2</sub></sub>.<sup>1,2</sup> Volatile inhalational agents used intraoperatively do not interfere with the Stowe-Severinghaus-type electrode used in the PTC<sub>CO<sub>2</sub></sub> monitor.<sup>3</sup> Some monitor-related measurement drift may occur in the course of monitoring; a calibration check performed following removal of the skin sensor indicated less than a 2 mmHg drift in our case. Although obtaining a Pa<sub>CO<sub>2</sub></sub> could be useful in establishing a relationship between Pa<sub>CO<sub>2</sub></sub> and PTC<sub>CO<sub>2</sub></sub>, we chose to avoid arterial puncture and institute monitoring prior to surgery, establishing a baseline while the infant was spontaneously breathing. By comparing subsequent changes in PTC<sub>CO<sub>2</sub></sub> to baseline conditions, we were able to identify periods of hypoventilation.

STUART WEINBERG, M.D.

*Assistant Professor of Anesthesiology and Pediatrics*

PAUL WERBIN, M.S.

*Student Nurse Anesthetist*

*Medical College of Virginia*

*Richmond, Virginia*

### REFERENCES

1. Bhat R, Diaz-Blanco J, Chaudhry U, Vidyasagar D: Transcutaneous oxygen and carbon dioxide monitoring in sick neonates using a combined sensor. *Chest* 88:890-894, 1985
2. Tremper KK, Shoemaker WC, Shippy CR, Nolan LS: Transcutaneous P<sub>CO<sub>2</sub></sub> monitoring on adult patients in the ICU and the operating room. *Crit Care Med* 9:752-755, 1981
3. Eberhard P, Mindt W: Interference of anesthetic gases at skin surface sensors for oxygen and carbon dioxide. *Crit Care Med* 9:717-720, 1981

*(Accepted for publication August 19, 1986.)*
